# Supplementary material
Source: PubMed Central journal article supplement (PMC9365515)
Supplement: mmc1.pdf [file mmc1.pdf]

**General Floor**

**Day 1**

**Day 2**

**day 5**

**day 8**

**day 11**

**day 14**

**MRN**

**NAME**

**DATE OF ADMISSION**

**Severity of illness**

**PROLACTIN**

**GH**

**IGF-1**

**TSH**

**FT4**

**T3**

**CORTISOL**

**ACTH**

**DHEAS**

**LH**

**FSH**

**TESTOSTERONE (Male)**

**E2 (Female)**

**Calcium**

**PO4**

**Mg**

**ALK. Phosph**

**PTH**

**Vitamin D**

**RENIN**

**ALDOSTERONE**

**NA**

**K**

**FBS**

**Fasting C-Peptide**

**Fasting insulin**

**HBA1C**

**Total Cholesterol**

**Triglyceride**

**LDL**

**HDL**
